# Supplementary material
Source: PubMed Central journal article supplement (PMC4151266)

Supplementary Fig. S1 The comparison of our study and relevant published datasets. Shared up-regulated (A) and down-regulated (B) genes in GSE36984 (fetal and adult differentiating proerythroblasts). Red circle: differentially expressed genes from RNA-Seq data; black circle: differentially expressed genes from microarray data.

**A**

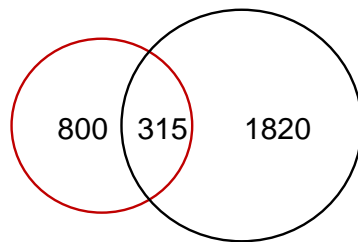

**B**

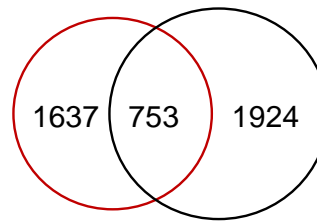

Supplementary Fig. S2 Immunophenotype of erythroblasts derived from HESCs (ESERs, left), FL (FLERs, center), and mobilized PB CD34+ cells (PBERs, right) as determined by flow cytometry. Red lines: histograms of isotype controls. Blue lines: histograms of CD71-FITC (top panels) or CD36-APC (bottom panels) staining.

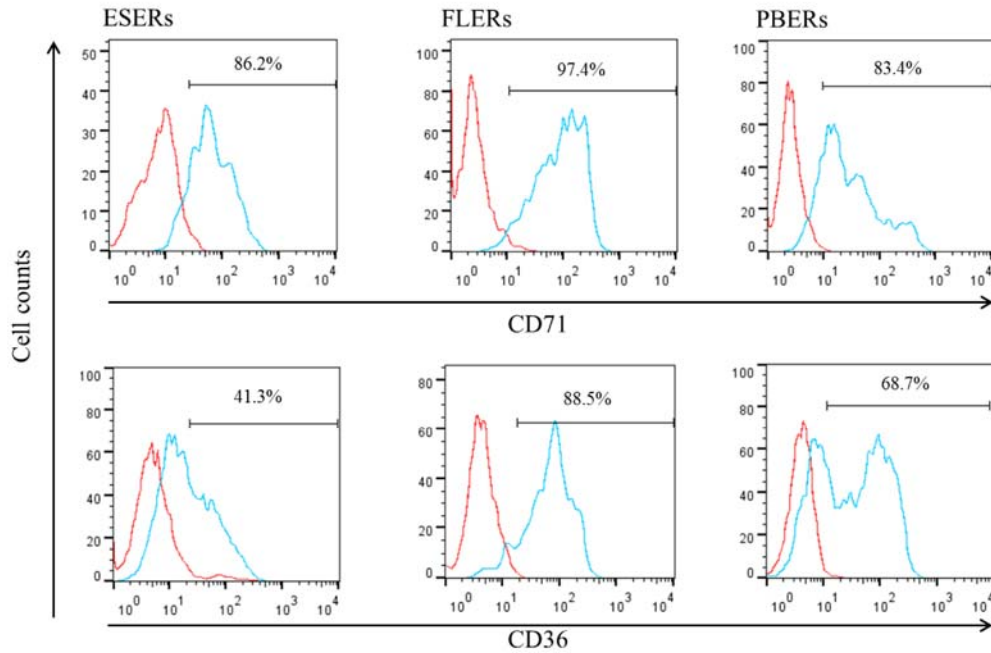

Supplement: NIHMS624103-supplement-mmc1.pdf [file NIHMS624103-supplement-mmc1.pdf]
