# Supplementary material
Source: PubMed Central journal article supplement (PMC4151266)
Supplement: NIHMS624103-supplement-mmc2.pdf [file NIHMS624103-supplement-mmc2.pdf]

Table S1 Read mapping summary.

| <b>Reads mapping</b>            | <b>HESCs</b>      | <b>ESERs</b>      | <b>FLERs</b>     | <b>PBERs</b>     |
|---------------------------------|-------------------|-------------------|------------------|------------------|
| Raw reads                       | 124,622,688       | 117,854,028       | 45,861,338       | 59,418,706       |
| Reads after filtering rRNAs     | 117,215,844       | 111,249,079       | 39,879,190       | 56,212,103       |
| Mapped reads                    | 49,560,369        | 42,813,442        | 12,830,921       | 14,361,541       |
| Mapped to unique loci(/mapped)  | 37,880,552(76%)   | 31,153,327(72%)   | 8,922,516(70%)   | 9,319,730(65%)   |
| Mapped to multi loci(2-10)      | 9,824,103(19.8%)  | 10,178,601(23.8%) | 3,367,100(26.2%) | 4,175,432(29%)   |
| Mapped to introns               | 12,293,665(32.5%) | 10,882,646(34.9%) | 2,884,795(32.3%) | 4,217,748(45.3%) |
| Mapped to exons                 | 14,096,495(37.2%) | 13,937,099(44.7%) | 3,141,698(35.2%) | 3,197,192(34.3%) |
| Mapped to intergenic regions    | 9,873,062(26.1%)  | 5,189,477(16.7%)  | 2,650,619(29.7%) | 1,657,713(17.8%) |
| Mapped to intron-exon junctions | 1,617,330(4.3%)   | 1,144,105(4.3%)   | 245,404(2.8%)    | 247,077(2.7%)    |
