# Supplementary material
Source: PubMed Central journal article supplement (PMC4151266)
Supplement: NIHMS624103-supplement-mmc3.pdf [file NIHMS624103-supplement-mmc3.pdf]

Table S2 The significantly enriched GO categories from uniquely expressed gene in HESCs and ESERs

| GO category                                                  | p-value  |
|--------------------------------------------------------------|----------|
| <b>HESC</b>                                                  |          |
| multicellular organismal process                             | 2.68E-60 |
| single-organism process                                      | 4.55E-52 |
| system process                                               | 1.86E-42 |
| multicellular organismal signaling                           | 6.14E-38 |
| system development                                           | 7.94E-38 |
| passive transmembrane transporter activity                   | 3.27E-32 |
| channel activity                                             | 3.27E-32 |
| cell periphery                                               | 3.47E-54 |
| extracellular region                                         | 9.34E-35 |
| <b>ESER</b>                                                  |          |
| immune response                                              | 1.60E-03 |
| immune system process                                        | 6.80E-03 |
| locomotion                                                   | 6.80E-03 |
| cellular component movement                                  | 1.00E-02 |
| neurotransmitter transporter activity                        | 2.00E-04 |
| neurotransmitter:sodium symporter activity                   | 6.00E-04 |
| gamma-aminobutyric acid:sodium symporter activity            | 9.00E-04 |
| receptor activity                                            | 1.30E-03 |
| L-gamma-aminobutyric acid transmembrane transporter activity | 1.30E-03 |
| signal transducer activity                                   | 1.60E-03 |
| short-chain fatty acid transporter activity                  | 1.60E-03 |
| molecular transducer activity                                | 1.60E-03 |
| solute:sodium symporter activity                             | 1.60E-03 |
| signaling receptor activity                                  | 1.70E-03 |
| membrane part                                                | 2.00E-04 |
| plasma membrane part                                         | 1.80E-03 |
| integral to membrane                                         | 3.70E-03 |
| membrane                                                     | 3.70E-03 |
| intrinsic to membrane                                        | 3.70E-03 |
| plasma membrane                                              | 5.40E-03 |
