# Supplementary material
Source: PubMed Central journal article supplement (PMC4151266)
Supplement: NIHMS624103-supplement-mmc4.pdf [file NIHMS624103-supplement-mmc4.pdf]

Table S3 Differential expression of specific genes (RPKM) in HESC, ESER, FLER and PBER cells.

|                                 | Symbol  | Gene Name                                                                                              | HESC      | ESER      | FLER     | PBER      |
|---------------------------------|---------|--------------------------------------------------------------------------------------------------------|-----------|-----------|----------|-----------|
| <b>Pluripotency</b>             |         |                                                                                                        |           |           |          |           |
| NM_002701                       | POU5F1  | Homo sapiens POU class 5 homeobox 1 (POU5F1), transcript variant 1, mRNA                               | 252.38    | 0         | 0        | 0         |
| NM_203289                       | POU5F1  | Homo sapiens POU class 5 homeobox 1 (POU5F1), transcript variant 2, mRNA                               | 139.29    | 0         | 0        | 0         |
| NM_024865                       | NANOG   | Homo sapiens Nanog homeobox (NANOG), mRNA                                                              | 64.54     | 0         | 0.222889 | 0         |
| NM_003106                       | SOX2    | Homo sapiens SRY (sex determining region Y)-box 2 (SOX2), mRNA                                         | 45.9612   | 0         | 0        | 0         |
| NM_030625                       | TET1    | Homo sapiens tet oncogene 1 (TET1), mRNA                                                               | 23.3937   | 0.773679  | 0.552973 | 0.0871833 |
| <b>Erythropoiesis</b>           |         |                                                                                                        |           |           |          |           |
| NM_005330                       | HBE1    | Homo sapiens hemoglobin, epsilon 1 (HBE1), mRNA                                                        | 1.42346   | 49456.2   | 168.962  | 1.30458   |
| NM_000559                       | HBG1    | Homo sapiens hemoglobin, gamma A (HBG1), mRNA                                                          | 1.05451   | 26402.3   | 15929.8  | 3496.3    |
| NM_000184                       | HBG2    | Homo sapiens hemoglobin, gamma G (HBG2), mRNA                                                          | 0         | 11129.4   | 24333.8  | 2305.98   |
| NM_000518                       | HBB     | Homo sapiens hemoglobin, beta (HBB), mRNA                                                              | 0.843411  | 9.9266    | 434.803  | 9519.04   |
| NM_002049                       | GATA1   | Homo sapiens GATA binding protein 1 (globin transcription factor 1) (GATA1), mRNA                      | 0         | 138.207   | 39.0474  | 58.6138   |
| NM_006563                       | KLF1    | Homo sapiens Kruppel-like factor 1 (erythroid) (KLF1), mRNA                                            | 0         | 109.305   | 66.7339  | 70.3207   |
| NM_001136023                    | NFE2    | Homo sapiens nuclear factor (erythroid-derived 2), 45kDa (NFE2), transcript variant 2, mRNA            | 0.561676  | 174.936   | 95.3244  | 46.8577   |
| NM_003189                       | TAL1    | Homo sapiens T-cell acute lymphocytic leukemia 1 (TAL1), mRNA                                          | 0         | 93.8465   | 44.4529  | 36.2629   |
| NM_005574                       | LMO2    | Homo sapiens LIM domain only 2 (rhombotin-like 1) (LMO2), transcript variant 1, mRNA                   | 0.218743  | 54.8054   | 52.8189  | 18.2199   |
| NM_001142315                    | LMO2    | Homo sapiens LIM domain only 2 (rhombotin-like 1) (LMO2), transcript variant 2, mRNA                   | 0.314468  | 75.5893   | 71.2913  | 24.8836   |
| NM_001142316                    | LMO2    | Homo sapiens LIM domain only 2 (rhombotin-like 1) (LMO2), transcript variant 3, mRNA                   | 0.358213  | 72.5501   | 67.0394  | 23.0869   |
| NM_033326                       | SOX6    | Homo sapiens SRY (sex determining region Y)-box 6 (SOX6), transcript variant 2, mRNA                   | 0         | 0.292506  | 3.52012  | 6.48302   |
| NM_017508                       | SOX6    | Homo sapiens SRY (sex determining region Y)-box 6 (SOX6), transcript variant 1, mRNA                   | 0         | 0.286268  | 3.42994  | 6.19627   |
| NM_022893                       | BCL11A  | Homo sapiens B-cell CLL/lymphoma 11A (zinc finger protein) (BCL11A), transcript variant 1, mRNA        | 2.54398   | 0         | 0.301471 | 2.82222   |
| NM_018014                       | BCL11A  | Homo sapiens B-cell CLL/lymphoma 11A (zinc finger protein) (BCL11A), transcript variant 2, mRNA        | 2.64121   | 0         | 0.41351  | 2.93792   |
| NM_138559                       | BCL11A  | Homo sapiens B-cell CLL/lymphoma 11A (zinc finger protein) (BCL11A), transcript variant 3, mRNA        | 2.56375   | 0         | 0.627989 | 1.97847   |
| <b>Cell proliferation</b>       |         |                                                                                                        |           |           |          |           |
| NM_001039535                    | SKA1    | Homo sapiens spindle and kinetochore associated complex subunit 1 (SKA1), transcript variant 1, mRNA   | 5.18422   | 4.09181   | 10.7916  | 5.91805   |
| NM_145060                       | SKA1    | Homo sapiens spindle and kinetochore associated complex subunit 1 (SKA1), transcript variant 2, mRNA   | 5.12686   | 4.11151   | 10.6327  | 5.8892    |
| NM_145061                       | SKA3    | Homo sapiens spindle and kinetochore associated complex subunit 3 (SKA3), transcript variant 1, mRNA   | 14.6711   | 1.54495   | 3.13042  | 2.00115   |
| NM_031966                       | CCNB1   | Homo sapiens cyclin B1 (CCNB1), mRNA                                                                   | 41.8265   | 12.9257   | 38.7634  | 11.8548   |
| NM_001237                       | CCNA2   | Homo sapiens cyclin A2 (CCNA2), mRNA                                                                   | 30.6256   | 17.2428   | 47.1297  | 26.2794   |
| NM_001002244                    | ANAPC11 | Homo sapiens anaphase promoting complex subunit 11 (ANAPC11), transcript variant 1, mRNA               | 10.9099   | 5.53926   | 12.2078  | 3.38909   |
| NM_016476                       | ANAPC11 | Homo sapiens anaphase promoting complex subunit 11 (ANAPC11), transcript variant 2, mRNA               | 13.081    | 6.76532   | 16.0766  | 4.21529   |
| NM_001002245                    | ANAPC11 | Homo sapiens anaphase promoting complex subunit 11 (ANAPC11), transcript variant 3, mRNA               | 14.3393   | 7.43225   | 17.2651  | 4.44449   |
| NM_001002246                    | ANAPC11 | Homo sapiens anaphase promoting complex subunit 11 (ANAPC11), transcript variant 4, mRNA               | 13.475    | 6.9263    | 16.6361  | 4.28122   |
| NM_001002247                    | ANAPC11 | Homo sapiens anaphase promoting complex subunit 11 (ANAPC11), transcript variant 5, mRNA               | 14.1971   | 7.35858   | 17.0939  | 4.40043   |
| NM_001002248                    | ANAPC11 | Homo sapiens anaphase promoting complex subunit 11 (ANAPC11), transcript variant 6, mRNA               | 13.3511   | 6.86261   | 16.4832  | 4.24185   |
| NM_001002249                    | ANAPC11 | Homo sapiens anaphase promoting complex subunit 11 (ANAPC11), transcript variant 7, mRNA               | 12.5077   | 6.41285   | 14.7195  | 3.95282   |
| NM_152562                       | CDCA2   | Homo sapiens cell division cycle associated 2 (CDCA2), mRNA                                            | 12.1846   | 3.03735   | 7.54226  | 7.52458   |
| NM_031299                       | CDCA3   | Homo sapiens cell division cycle associated 3 (CDCA3), mRNA                                            | 10.379    | 9.27313   | 27.0447  | 9.99821   |
| <b>Cell communication</b>       |         |                                                                                                        |           |           |          |           |
| NM_007368                       | RASA3   | Homo sapiens RAS p21 protein activator 3 (RASA3), mRNA                                                 | 4.01638   | 1.97946   | 0.705142 | 1.7905    |
| NM_004658                       | RASAL1  | Homo sapiens RAS protein activator like 1 (GAP1 like) (RASAL1), mRNA                                   | 0.726727  | 0.123301  | 0        | 0         |
| NM_004296                       | RGS6    | Homo sapiens regulator of G-protein signaling 6 (RGS6), mRNA                                           | 0.0644321 | 3.58151   | 0.190222 | 0.424872  |
| NM_012419                       | RGS17   | Homo sapiens regulator of G-protein signaling 17 (RGS17), mRNA                                         | 2.16088   | 0.306542  | 0        | 0         |
| NM_182982                       | GRK4    | Homo sapiens G protein-coupled receptor kinase 4 (GRK4), transcript variant 1, mRNA                    | 0.0912663 | 0.0971025 | 0        | 0         |
| NM_001004056                    | GRK4    | Homo sapiens G protein-coupled receptor kinase 4 (GRK4), transcript variant 2, mRNA                    | 0.0952165 | 0.101305  | 0        | 0         |
| NM_001004057                    | GRK4    | Homo sapiens G protein-coupled receptor kinase 4 (GRK4), transcript variant 3, mRNA                    | 0.0970543 | 0.0885091 | 0        | 0         |
| <b>Membranes and organelles</b> |         |                                                                                                        |           |           |          |           |
| NM_002520                       | NPM1    | Homo sapiens nucleophosmin (nucleolar phosphoprotein B23, numatrin) (NPM1), transcript variant 1, mRNA | 103.823   | 38.2518   | 50.5035  | 12.7063   |
| NM_199185                       | NPM1    | Homo sapiens nucleophosmin (nucleolar phosphoprotein B23, numatrin) (NPM1), transcript variant 2, mRNA | 109.182   | 40.7664   | 55.0746  | 13.8321   |
| NM_001037738                    | NPM1    | Homo sapiens nucleophosmin (nucleolar phosphoprotein B23, numatrin) (NPM1), transcript variant 3, mRNA | 111.738   | 59.2111   | 51.4404  | 17.1453   |
| NM_001620                       | AHNAK   | Homo sapiens AHNAK nucleoprotein (AHNAK), transcript variant 1, mRNA                                   | 8.30197   | 1.15841   | 3.01557  | 1.23236   |
| NM_024060                       | AHNAK   | Homo sapiens AHNAK nucleoprotein (AHNAK), transcript variant 2, mRNA                                   | 1.76799   | 0         | 1.00102  | 0.447168  |
| NM_138400                       | NOM1    | Homo sapiens nucleolar protein with MIF4G domain 1 (NOM1), mRNA                                        | 3.47958   | 0.792314  | 1.80831  | 0.882268  |
| NM_198887                       | NUP43   | Homo sapiens nucleoporin 43kDa (NUP43), transcript variant 1, mRNA                                     | 17.59     | 8.11659   | 9.41803  | 4.63238   |
| NM_016391                       | NOP16   | Homo sapiens NOP16 nucleolar protein homolog (yeast) (NOP16), mRNA                                     | 6.14497   | 2.15191   | 11.0302  | 0.648328  |

|                                                          |         |                                                                                                                                                  |           |          |          |           |
|----------------------------------------------------------|---------|--------------------------------------------------------------------------------------------------------------------------------------------------|-----------|----------|----------|-----------|
| NM_017547                                                | FOXRED1 | Homo sapiens FAD-dependent oxidoreductase domain containing 1 (FOXRED1), mRNA                                                                    | 11.6366   | 10.2007  | 8.1492   | 3.28344   |
| NM_005004                                                | NDUFB8  | Homo sapiens NADH dehydrogenase (ubiquinone) 1 beta subcomplex, 8, 19kDa (NDUFB8), mRNA                                                          | 47.1791   | 20.8224  | 23.1765  | 7.71416   |
| NM_014342                                                | MTCH2   | Homo sapiens mitochondrial carrier homolog 2 (C. elegans) (MTCH2), nuclear gene encoding mitochondrial protein, mRNA                             | 4.39269   | 5.3931   | 8.15251  | 3.34653   |
| NM_001688                                                | ATP5F1  | Homo sapiens ATP synthase, H+ transporting, mitochondrial F0 complex, subunit B1 (ATP5F1), nuclear gene encoding mitochondrial protein, mRNA     | 13.4318   | 9.94605  | 17.954   | 4.90495   |
| NM_013365                                                | GGA1    | Homo sapiens golgi associated, gamma adaptin ear containing, ARF binding protein 1 (GGA1), transcript variant 1, mRNA                            | 4.96344   | 5.92272  | 1.21699  | 1.19823   |
| NM_001001560                                             | GGA1    | Homo sapiens golgi associated, gamma adaptin ear containing, ARF binding protein 1 (GGA1), transcript variant 2, mRNA                            | 4.66131   | 5.12116  | 1.24612  | 1.21012   |
| NM_001001561                                             | GGA1    | Homo sapiens golgi associated, gamma adaptin ear containing, ARF binding protein 1 (GGA1), transcript variant 3, mRNA                            | 1.22966   | 1.13559  | 1.24074  | 0.574779  |
| NM_020399                                                | GOPC    | Homo sapiens golgi associated PDZ and coiled-coil motif containing (GOPC), transcript variant 1, mRNA                                            | 4.67986   | 4.18414  | 2.86146  | 0.998394  |
| NM_001017408                                             | GOPC    | Homo sapiens golgi associated PDZ and coiled-coil motif containing (GOPC), transcript variant 2, mRNA                                            | 4.70439   | 4.20607  | 2.87646  | 1.00363   |
| NM_152281                                                | GORAB   | Homo sapiens golgin, RAB6-interacting (GORAB), transcript variant 1, mRNA                                                                        | 2.92246   | 0.675466 | 0.249569 | 0         |
| NM_016548                                                | GOLM1   | Homo sapiens golgi membrane protein 1 (GOLM1), transcript variant 1, mRNA                                                                        | 14.0227   | 1.74158  | 15.0276  | 7.05805   |
| NM_177937                                                | GOLM1   | Homo sapiens golgi membrane protein 1 (GOLM1), transcript variant 2, mRNA                                                                        | 14.1487   | 1.76045  | 15.3187  | 7.24888   |
| NM_020909                                                | EPB41L5 | Homo sapiens erythrocyte membrane protein band 4.1 like 5 (EPB41L5), mRNA                                                                        | 5.16673   | 0.961997 | 0        | 0.0638811 |
| NM_152468                                                | TMC8    | Homo sapiens transmembrane channel-like 8 (TMC8), mRNA                                                                                           | 0.077661  | 0.929783 | 0.687833 | 2.66294   |
| NM_002294                                                | LAMP2   | Homo sapiens lysosomal-associated membrane protein 2 (LAMP2), transcript variant A, mRNA                                                         | 2.49242   | 3.05012  | 1.14752  | 2.52606   |
| NM_001122606                                             | LAMP2   | Homo sapiens lysosomal-associated membrane protein 2 (LAMP2), transcript variant C, mRNA                                                         | 3.53203   | 4.37173  | 1.43327  | 3.9529    |
| NM_013995                                                | LAMP2   | Homo sapiens lysosomal-associated membrane protein 2 (LAMP2), transcript variant B, mRNA                                                         | 6.50085   | 9.78032  | 2.83198  | 9.45387   |
| NM_005506                                                | SCARB2  | Homo sapiens scavenger receptor class B, member 2 (SCARB2), mRNA                                                                                 | 9.52424   | 0.57465  | 0.689415 | 2.25844   |
| NM_012434                                                | SLC17A5 | Homo sapiens solute carrier family 17 (anion/sugar transporter), member 5 (SLC17A5), mRNA                                                        | 2.72431   | 0.842679 | 0.164622 | 0.735385  |
| NM_198098                                                | AQP1    | Homo sapiens aquaporin 1 (Colton blood group) (AQP1), mRNA                                                                                       | 0.0479281 | 1.23549  | 1.35837  | 14.7655   |
| <b>Cell adhesion, migration or cell-cell interaction</b> |         |                                                                                                                                                  |           |          |          |           |
| NM_000610                                                | CD44    | Homo sapiens CD44 molecule (Indian blood group) (CD44), transcript variant 1, mRNA                                                               | 4.29233   | 3.70161  | 1.78118  | 5.00484   |
| NM_001001389                                             | CD44    | Homo sapiens CD44 molecule (Indian blood group) (CD44), transcript variant 2, mRNA                                                               | 4.37702   | 3.78684  | 1.82219  | 5.09521   |
| NM_001001390                                             | CD44    | Homo sapiens CD44 molecule (Indian blood group) (CD44), transcript variant 3, mRNA                                                               | 4.82433   | 4.18547  | 2.01682  | 5.65703   |
| NM_001001391                                             | CD44    | Homo sapiens CD44 molecule (Indian blood group) (CD44), transcript variant 4, mRNA                                                               | 4.46979   | 4.4697   | 2.17387  | 6.05416   |
| NM_001001392                                             | CD44    | Homo sapiens CD44 molecule (Indian blood group) (CD44), transcript variant 5, mRNA                                                               | 3.92423   | 3.71216  | 2.16     | 5.3157    |
| NM_001904                                                | CTNNB1  | Homo sapiens catenin (cadherin-associated protein), beta 1, 88kDa (CTNNB1), transcript variant 1, mRNA                                           | 71.7025   | 25.8089  | 8.42219  | 4.19561   |
| NM_001098209                                             | CTNNB1  | Homo sapiens catenin (cadherin-associated protein), beta 1, 88kDa (CTNNB1), transcript variant 2, mRNA                                           | 74.5582   | 26.3938  | 8.26152  | 4.42272   |
| NM_001098210                                             | CTNNB1  | Homo sapiens catenin (cadherin-associated protein), beta 1, 88kDa (CTNNB1), transcript variant 3, mRNA                                           | 76.6667   | 26.9926  | 8.40166  | 4.56528   |
| NM_002211                                                | ITGB1   | Homo sapiens integrin, beta 1 (fibronectin receptor, beta polypeptide, antigen CD29 includes MDF2, MSK12) (ITGB1), transcript variant 1A, mRNA   | 53.8462   | 10.1717  | 14.1621  | 33.3087   |
| NM_033666                                                | ITGB1   | Homo sapiens integrin, beta 1 (fibronectin receptor, beta polypeptide, antigen CD29 includes MDF2, MSK12) (ITGB1), transcript variant 1B, mRNA   | 54.9484   | 10.9915  | 14.878   | 36.4881   |
| NM_033667                                                | ITGB1   | Homo sapiens integrin, beta 1 (fibronectin receptor, beta polypeptide, antigen CD29 includes MDF2, MSK12) (ITGB1), transcript variant 1C-1, mRNA | 55.3074   | 10.5677  | 14.5565  | 34.3004   |
| NM_033669                                                | ITGB1   | Homo sapiens integrin, beta 1 (fibronectin receptor, beta polypeptide, antigen CD29 includes MDF2, MSK12) (ITGB1), transcript variant 1C-2, mRNA | 55.6186   | 10.6284  | 14.6399  | 34.4878   |
| NM_033668                                                | ITGB1   | Homo sapiens integrin, beta 1 (fibronectin receptor, beta polypeptide, antigen CD29 includes MDF2, MSK12) (ITGB1), transcript variant 1D, mRNA   | 55.9085   | 10.6285  | 14.7196  | 34.5583   |
| NM_133376                                                | ITGB1   | Homo sapiens integrin, beta 1 (fibronectin receptor, beta polypeptide, antigen CD29 includes MDF2, MSK12) (ITGB1), transcript variant 1E, mRNA   | 55.0175   | 10.4339  | 14.4649  | 33.9882   |
| NM_000484                                                | APP     | Homo sapiens amyloid beta (A4) precursor protein (APP), transcript variant 1, mRNA                                                               | 120.72    | 9.3811   | 1.82647  | 6.37367   |
| NM_201413                                                | APP     | Homo sapiens amyloid beta (A4) precursor protein (APP), transcript variant 2, mRNA                                                               | 121.945   | 9.5129   | 1.85564  | 6.47543   |
| NM_201414                                                | APP     | Homo sapiens amyloid beta (A4) precursor protein (APP), transcript variant 3, mRNA                                                               | 121.503   | 9.16179  | 1.69527  | 6.50866   |
| NM_001136129                                             | APP     | Homo sapiens amyloid beta (A4) precursor protein (APP), transcript variant 5, mRNA                                                               | 116.728   | 8.85909  | 1.76033  | 6.50631   |
| NM_001136130                                             | APP     | Homo sapiens amyloid beta (A4) precursor protein (APP), transcript variant 6, mRNA                                                               | 116.217   | 9.10888  | 1.89375  | 6.36483   |
| <b>Others</b>                                            |         |                                                                                                                                                  |           |          |          |           |
| NM_000584                                                | IL8     | Homo sapiens interleukin 8 (IL8), mRNA                                                                                                           | 0.431196  | 0.679659 | 0        | 1.89556   |
| NM_005931                                                | MICB    | Homo sapiens MHC class I polypeptide-related sequence B (MICB), mRNA                                                                             | 2.42035   | 0.282522 | 0.705422 | 1.8641    |
