# Supplementary material
Source: PubMed Central journal article supplement (PMC4151266)
Supplement: NIHMS624103-supplement-mmc5.pdf [file NIHMS624103-supplement-mmc5.pdf]

Table S4 Shared up- and down-regulated genes  
in RNA-Seq and micro-array datasets

| PBER > FLER & adult CD34+_EPO > fetal CD34+_EPO | PBER < FLER & adult CD34+_EPO < fetal CD34+_EPO |
|-------------------------------------------------|-------------------------------------------------|
| A4GALT                                          | AASDHPPT                                        |
| AASS                                            | ABAT                                            |
| ABCA5                                           | ABT1                                            |
| ABL1                                            | ACAA1                                           |
| ABTB1                                           | ACAA2                                           |
| ACADS                                           | ACADM                                           |
| ACAP1                                           | ACLY                                            |
| ACHE                                            | ACO1                                            |
| ACP5                                            | ACO2                                            |
| ACSBG1                                          | ACOT7                                           |
| ACSL1                                           | ACOT9                                           |
| ACSL5                                           | ACTB                                            |
| AKAP9                                           | ACTG1                                           |
| AKR1C2                                          | ACVR1B                                          |
| AKR1C3                                          | ACY1                                            |
| AKTIP                                           | ADCY7                                           |
| ALDH1A1                                         | ADPGK                                           |
| ANKRD9                                          | ADSL                                            |
| ANO5                                            | AHCY                                            |
| ANPEP                                           | AHNAK                                           |
| APOL3                                           | AK2                                             |
| AQP1                                            | AK7                                             |
| AQP3                                            | AKAP2                                           |
| ARRB2                                           | AKIRIN1                                         |
| ASAP1                                           | AKR1B1                                          |
| ATP7B                                           | ALDH16A1                                        |
| BCL11A                                          | ALDH1B1                                         |
| BMPR2                                           | ALDH2                                           |
| BSPRY                                           | ALG1                                            |
| C12orf57                                        | ALG14                                           |
| C2orf69                                         | ALKBH1                                          |
| C5orf42                                         | ALKBH2                                          |
| C6orf223                                        | ALKBH3                                          |
| C9orf16                                         | ALOX12                                          |
| C9orf72                                         | ALS2                                            |
| CA1                                             | AMOT                                            |
| CA3                                             | AMOTL1                                          |
| CAPRIN2                                         | ANAPC13                                         |
| CAPS2                                           | ANAPC5                                          |
| CASC5                                           | ANKRD39                                         |
| CBX4                                            | ANXA1                                           |
| CBX7                                            | ANXA11                                          |
| CCDC14                                          | APOBEC3C                                        |
| CCRL2                                           | APPL1                                           |
| CCS                                             | ARF6                                            |
| CD36                                            | ARG1                                            |
| CD44                                            | ARHGAP15                                        |
| CD47                                            | ARID3A                                          |
| CD70                                            | ARMC6                                           |
| CDYL2                                           | ARMCX1                                          |
| CHST12                                          | ARMCX3                                          |
| CHST2                                           | ASL                                             |
| CLCN2                                           | ATAD3A                                          |
| CLCN3                                           | ATP5B                                           |
| CNNM2                                           | ATP5C1                                          |
| CNNM3                                           | ATP5F1                                          |
| CPEB1                                           | ATP5G1                                          |
| CPNE8                                           | ATP5J2                                          |
| CREB3L1                                         | ATP5SL                                          |
| CTSE                                            | ATP6V1G1                                        |
| CXorf57                                         | ATXN10                                          |
| DAAM1                                           | AVEN                                            |
| DDHD1                                           | B9D1                                            |
| DENND2D                                         | BAG2                                            |
| DGKA                                            | BAIAP2                                          |
| DLEU2                                           | BCAT1                                           |
| DNAJB4                                          | BCCIP                                           |
| DYRK3                                           | BICD2                                           |
| EGFL8                                           | BIN2                                            |

|          |          |
|----------|----------|
| EIF1B    | BOP1     |
| EMID1    | BZW2     |
| ENG      | C10orf32 |
| EPDR1    | C11orf48 |
| EPHX1    | C11orf49 |
| ERAP2    | C12orf45 |
| ESPN     | C14orf2  |
| ETS2     | C19orf48 |
| FAM134C  | C1orf116 |
| FAM160B1 | C1orf159 |
| FAM193B  | C1QBP    |
| FAM19A2  | C21orf33 |
| FAM65A   | C6orf211 |
| FAM73A   | CACHD1   |
| FAS      | CALM1    |
| FBXL20   | CAMK1    |
| FBXO3    | CAMLG    |
| FCGR2B   | CAP1     |
| FCGRT    | CARD9    |
| FGD4     | CBFB     |
| FKBP1B   | CCDC23   |
| FOXO1    | CCDC43   |
| FZD1     | CCDC50   |
| FZD5     | CCDC86   |
| FZD6     | CCNJ     |
| GAD1     | CCR7     |
| GAS2L3   | CCT2     |
| GCH1     | CCT3     |
| GCNT1    | CCT4     |
| GCNT2    | CCT7     |
| GDI1     | CCT8     |
| GFOD1    | CD320    |
| GLIPR2   | CD63     |
| GNG10    | CDC25A   |
| GOLGA8B  | CDC34    |
| GOLIM4   | CDCA7    |
| GPR56    | CEBPZ    |
| GRINA    | CENPV    |
| H1FX     | CFL1     |
| HBB      | CHCHD1   |
| HBD      | CHCHD2   |
| HERC6    | CHCHD4   |
| HIPK2    | CHCHD7   |
| HLA-DPA1 | CIAPIN1  |
| HLA-DPB1 | CIRH1A   |
| HOMER2   | CISD3    |
| HOOK1    | CISH     |
| HYI      | CKLF     |
| ICA1     | CLDN11   |
| IDUA     | CLNS1A   |
| IFITM1   | CLPP     |
| IGFBP7   | CNN2     |
| IL18     | CNPY2    |
| IMPA2    | COL4A5   |
| IRS2     | COPS6    |
| ITGB1    | COPS7A   |
| ITLN1    | COQ4     |
| ITPKB    | COQ5     |
| JAZF1    | CORO1C   |
| JMY      | COX5B    |
| KANK2    | COX6A1   |
| KCNAB2   | COX6B1   |
| KCNN4    | COX6C    |
| KDM6A    | COX7A2   |
| KIAA0247 | COX7C    |
| KIAA0922 | CRIM1    |
| KIAA1804 | CRISP3   |
| KIF21A   | CRYZ     |
| KIF26A   | CSRP1    |
| KIFC2    | CSTF2    |
| KLF9     | CTH      |
| KLHDC8A  | CTNNB1   |
| LAMP2    | CTSH     |

|           |          |
|-----------|----------|
| LATS2     | CUEDC2   |
| LCAT      | CUTA     |
| LHFPL2    | CXXC5    |
| LPCAT3    | CYC1     |
| LRP1      | DAD1     |
| LRP10     | DBI      |
| LRP11     | DCTPP1   |
| LRRC29    | DCXR     |
| LRRC70    | DDX1     |
| LYSMD2    | DDX18    |
| MAMLD1    | DDX21    |
| MAN2A1    | DDX41    |
| MANBA     | DDX55    |
| MANEA     | DENND5A  |
| MAP3K5    | DFFA     |
| MAP9      | DHCR24   |
| MAPK1     | DHCR7    |
| MED25     | DHODH    |
| MFSD6     | DHX16    |
| MGLL      | DLAT     |
| MICALL1   | DNAJC7   |
| MMD       | DNMBP    |
| MOSPD1    | DOCK2    |
| MRI1      | DPH2     |
| MXD3      | DPP3     |
| NAPRT1    | DRG1     |
| NBL1      | DRG2     |
| NDRG1     | DSTN     |
| NEURL1B   | EARS2    |
| NFAT5     | EBNA1BP2 |
| NFIC      | EBP      |
| NFIX      | ECE2     |
| NPC2      | ECHS1    |
| NPHP4     | EEF1D    |
| NR1D2     | EEF1E1   |
| NR1H2     | EFTUD2   |
| NRBP2     | EHD4     |
| NRIP3     | EI24     |
| NUP210    | EIF2B3   |
| OLIG1     | EIF3B    |
| OSBPL2    | EIF3C    |
| OSM       | EIF3CL   |
| PAQR8     | EIF3I    |
| PAQR9     | EIF3M    |
| PARP10    | EIF6     |
| PC        | ELAVL2   |
| PDZK11P1  | EMG1     |
| PEAR1     | EML4     |
| PELI2     | ENO1     |
| PHC3      | EPCAM    |
| PHF11     | EPS8     |
| PHF15     | ERAL1    |
| PIGQ      | ERCC1    |
| PIGT      | ESF1     |
| PIK3AP1   | ESRRG    |
| PIK3CB    | ETFB     |
| PKD1      | EXOSC3   |
| PKN2      | EXOSC4   |
| PLEKHH3   | EXOSC7   |
| PLOD3     | EXOSC8   |
| PLXNB2    | EXTL3    |
| PLXND1    | FAH      |
| PNPLA2    | FAIM2    |
| PPDF      | FAM101B  |
| PPP1R9B   | FAM175A  |
| PPP2R5B   | FAM49A   |
| PRRG4     | FAM64A   |
| PTMS      | FAM83A   |
| PTPLA     | FBL      |
| PXK       | FBN1     |
| RAB11FIP3 | FDX1L    |
| RAB4A     | FEM1B    |
| RAB6B     | FEZ2     |

|          |            |
|----------|------------|
| RANBP10  | FH         |
| RCOR3    | FKBP1A     |
| REC8     | FKBP4      |
| REEP3    | FLAD1      |
| RELL1    | FLNB       |
| RFTN1    | FNTB       |
| RFX7     | FOXRED1    |
| RHOF     | FRG1       |
| RHOQ     | FUCA2      |
| RIMKLB   | FUNDC1     |
| RNF213   | GADD45G    |
| RNF217   | GADD45GIP1 |
| ROGDI    | GALE       |
| RORA     | GALK1      |
| RPS6KA5  | GALM       |
| RRAGD    | GAR1       |
| RYR3     | GART       |
| SATB1    | GATA2      |
| SCARB2   | GATA5      |
| SCPEP1   | GEMIN5     |
| SDC4     | GEMIN7     |
| SEPP1    | GFM2       |
| SERINC5  | GLRX       |
| SERPINE2 | GLUD1      |
| SESN1    | GMNN       |
| SETD1A   | GMPPA      |
| SETD1B   | GNAI1      |
| SFI1     | GNB1       |
| SGPP1    | GNL3       |
| SH3PXD2A | GOT2       |
| SLC14A1  | GPATCH3    |
| SLC15A4  | GPATCH4    |
| SLC22A16 | GPD1L      |
| SLC22A23 | GPNMB      |
| SLC2A4RG | GPS1       |
| SLC30A1  | GRHPR      |
| SLC46A3  | GRPEL1     |
| SMOX     | GSTO1      |
| SNTB1    | GSTP1      |
| SPHAR    | GTF3A      |
| SPSB3    | GTPBP4     |
| SSBP3    | GYG1       |
| STIM1    | HAUS7      |
| STK17B   | HBE1       |
| STK25    | HBG1       |
| STK32B   | HBG2       |
| STOM     | HBM        |
| STX11    | HBZ        |
| STX4     | HDAC7      |
| TACC1    | HDAC8      |
| TAPT1    | HDDC2      |
| TBXAS1   | HDDC3      |
| THRB     | HDHD2      |
| TIFA     | HEATR1     |
| TMEM131  | HEMK1      |
| TMEM86B  | HES1       |
| TMOD2    | HEXIM2     |
| TNFRSF14 | HEY2       |
| TNFRSF1B | HIC2       |
| TNRC18   | HIGD1A     |
| TNS1     | HIGD2A     |
| TNXB     | HMGA1      |
| TP53INP1 | HMGA2      |
| TRIM10   | HMGCS1     |
| TRPS1    | HMGN3      |
| TSPAN4   | HMOX2      |
| TSPO     | HNRNPH2    |
| TUBA4A   | HOXB4      |
| TUBG2    | HPGD       |
| UBA7     | HPGDS      |
| UBE2C    | HSBP1      |
| UBN2     | HSP90AA1   |
| ULK1     | HSP90AB1   |

VEGFA  
VGLL4  
VPS13D  
WNK1  
WWC3  
YPEL2  
YPEL3  
YPEL4  
ZBTB20  
ZBTB4  
ZBTB7A  
ZEB1  
ZFP36L2  
ZFPM1  
ZMIZ1  
ZMYM6  
ZNF211  
ZNF329  
ZNF33A  
ZNF33B  
ZNF513  
ZNF555  
ZNF563  
ZNF577  
ZNF615  
ZNF713  
ZSCAN18

HSPA4  
HSPBP1  
HSPE1  
ICAM2  
ICAM4  
ICK  
ICT1  
IDH3A  
IDH3B  
IGF2BP1  
IGF2BP3  
IL1RAP  
ILF2  
IMP3  
IMP4  
INO80C  
INTS9  
INVS  
IPO5  
IQGAP2  
ITM2A  
ITPA  
ITPK1  
ITPRIPL1  
JAGN1  
KBTBD8  
KCNE3  
KCTD3  
KDM1B  
KHDRBS1  
KHK  
KLHL6  
KPNB1  
KRT13  
KRT19  
LAPTM4B  
LARS2  
LAS1L  
LCP1  
LDHB  
LIG3  
LIN28B  
LMAN1  
LOC81691  
LRPPRC  
LRRC42  
LRRC59  
LRRC8D  
LRRN2  
LSM3  
LSM7  
LSMD1  
LTV1  
LYAR  
LYN  
LYRM4  
MAGEF1  
MAGI3  
MAK16  
MAP1B  
MAPKAPK3  
MAPRE2  
MARCH3  
MARS2  
MBTPS2  
MDH1  
MDH2  
ME2  
MECOM  
MED6  
MEF2C  
MFAP3L  
MGST1

MINA  
MLX  
MOV10  
MPDZ  
MPI  
MRAP2  
MRM1  
MRPL11  
MRPL12  
MRPL13  
MRPL15  
MRPL16  
MRPL17  
MRPL21  
MRPL22  
MRPL24  
MRPL3  
MRPL36  
MRPL39  
MRPL40  
MRPL46  
MRPL51  
MRPL53  
MRPL9  
MRPS18A  
MRPS24  
MRPS25  
MRPS26  
MRPS27  
MRPS28  
MRPS33  
MRPS34  
MRPS35  
MRPS5  
MRPS6  
MRPS7  
MRS2  
MRTO4  
MSN  
MST4  
MT1X  
MYC  
MYCBP  
MYL12A  
MYL6  
MYLK3  
NAE1  
NANOS1  
NANS  
NAT10  
NCBP2  
NCL  
NDUFA13  
NDUFA4  
NDUFAB1  
NDUFAF4  
NDUFB11  
NDUFB2  
NDUFB6  
NDUFB8  
NDUFS4  
NDUFS5  
NDUFV1  
NEFH  
NFKB1  
NFKBIB  
NGFRAP1  
NME1  
NME1-NME2  
NME2  
NOB1  
NOC3L  
NOL10

NOL11  
NOL7  
NOLC1  
NOP16  
NOP2  
NOP56  
NOS3  
NPM1  
NPM3  
NRBF2  
NT5DC2  
NTHL1  
NUDT5  
NUP35  
NUP43  
OGFOD1  
OXA1L  
PA2G4  
PAFAH1B3  
PAICS  
PALM2-AKAP2  
PARD3  
PATZ1  
PCSK9  
PDCD11  
PDCD4  
PDE3A  
PDHA1  
PDHB  
PDHX  
PDSS1  
PEA15  
PEBP1  
PEMT  
PFAS  
PFKFB3  
PFN1  
PGK1  
PGK2  
PHACTR2  
PHB  
PHB2  
PHF19  
PHF6  
PIH1D1  
PIK3C3  
PIN1  
PKN1  
PLAGL1  
PLD1  
PLEK  
PLEKHB2  
PLVAP  
PMAIP1  
PMVK  
PNKD  
PNMA1  
PNPT1  
POLR1A  
POLR1B  
POLR2D  
POLR2E  
POLR3B  
POLR3E  
POLR3K  
POMP  
PPA1  
PPAT  
PPIF  
PPIL1  
PPIL3  
PPP5C  
PRDX1

PRDX2  
PREB  
PRELID1  
PREP  
PREX1  
PRG2  
PRKCA  
PRMT1  
PRMT5  
PRPF19  
PRPF31  
PSMA1  
PSMA3  
PSMA6  
PSMB1  
PSMB2  
PSMB3  
PSMB6  
PSMB7  
PSMC4  
PSMD13  
PSMD3  
PSMD8  
PTGER3  
PTPN1  
PTPN13  
PTPRB  
PWP1  
PWP2  
QTRTD1  
RABEPK  
RABGGTB  
RAC2  
RAF1  
RANGRF  
RARS  
RASSF5  
RBM28  
RCC1  
REEP6  
RHOBTB3  
RHOT1  
RILP  
RIOK1  
RIOK2  
RNF181  
RNMTL1  
ROMO1  
ROR2  
RPL19  
RPL23  
RPL31  
RPP14  
RPP38  
RPS23  
RPS4Y1  
RRN3  
RRP1  
RRP15  
RRP1B  
RRP9  
RRS1  
RSL1D1  
RUVBL2  
RWDD1  
RWDD2B  
SAMSN1  
SAP30  
SARS2  
SCO1  
SCO2  
SDHB  
SDHC



SDPR  
SEC11A  
SEC13  
SEC61G  
SEH1L  
SENP2  
SEPT6  
SEPT9  
SEPW1  
SERPINB6  
SF3B14  
SF3B3  
SFT2D1  
SFXN2  
SFXN4  
SH3TC2  
SIGMAR1  
SIPA1L1  
SKP2  
SLC16A1  
SLC16A9  
SLC24A3  
SLC25A13  
SLC25A17  
SLC25A21  
SLC25A26  
SLC25A32  
SLC25A33  
SLC25A4  
SLC25A6  
SLC2A3  
SLC38A1  
SLC43A3  
SLC5A6  
SLC04C1  
SMYD2  
SNHG3  
SNHG7  
SNORD114-3  
SNRPA  
SNRPA1  
SNRPB  
SNRPB2  
SNRPD3  
SNRPF  
SNX18  
SORBS1  
SORT1  
SPI1  
SPRED1  
SPRY2  
SRM  
SRRD  
SRXN1  
SSB  
SSBP1  
SSFA2  
SSR3  
SSSCA1  
ST6GALNAC3  
ST8SIA1  
STARD3NL  
STIP1  
STOML2  
STON2  
STRAP  
SUCLG1  
SUPT16H  
SURF6  
SYNGR2  
TACO1  
TADA3  
TAOK3

TARS2  
TBC1D4  
TBCB  
TCEAL8  
TCEB1  
TET1  
TEX15  
TFAM  
TFB1M  
TFB2M  
TGFBR1  
TGIF2  
THBS1  
THNSL1  
TIMM10  
TIMM13  
TIMM17A  
TIMM50  
TIMM8B  
TMED3  
TMED5  
TMEM126A  
TMEM177  
TMEM208  
TMEM64  
TMEM69  
TMEM9  
TMX2  
TNFRSF19  
TOMM20  
TOMM22  
TOMM34  
TOMM5  
TP11  
TRA2A  
TRAF4  
TRAP1  
TRAPPC2L  
TREML2  
TRIM6  
TRIP13  
TRMT1  
TRMT5  
TRPV2  
TRUB2  
TSEN2  
TSPAN3  
TSPAN32  
TSPYL5  
TSR1  
TSSC1  
TTC1  
TTC27  
TLL4  
TUBB1  
TUBB6  
TUFM  
TXN  
TXNRD1  
TYW3  
UAP1  
UBE2I  
UBE2N  
UBFD1  
UBL5  
UBOX5  
UCK2  
UMPS  
UNC13B  
UNC13D  
UQCRC1  
UQCRH  
UQCRQ

URM1  
USMG5  
USP11  
USP40  
UTP14A  
VAPA  
VCL  
VPS18  
VPS33A  
WBP5  
WBSCR22  
WDR1  
WDR12  
WDR3  
WDR4  
WDR43  
WDR74  
WNT5B  
XRN2  
YWHAB  
YWHAG  
ZNF117  
ZNF511  
ZNF639  
ZNF641  
ZNF691  
ZNF704
