# Supplementary material
Source: PubMed Central journal article supplement (PMC4151266)
Supplement: NIHMS624103-supplement-mmc6.pdf [file NIHMS624103-supplement-mmc6.pdf]

Table S5 Edge-node statistics of networks constructed with up-

**HESCs-ESERs comparisor**

| <b>Symbol</b>           | <b>k<sub>in</sub></b> | <b>k<sub>out</sub></b> | <b>k<sub>nd</sub></b> | <b>total</b> | <b>score</b> |
|-------------------------|-----------------------|------------------------|-----------------------|--------------|--------------|
| <b>NFkB (complex)</b>   | 30                    | 24                     | 0                     | 54           | 720          |
| <b>MYC</b>              | 23                    | 25                     | 1                     | 49           | 599.25       |
| <b>TGFB1</b>            | 11                    | 44                     | 0                     |              | 484          |
| <b>RELA</b>             | 21                    | 17                     | 2                     | 40           | 396          |
| <b>IL12 (complex)</b>   | 15                    | 25                     | 0                     | 40           | 375          |
| <b>IL13</b>             | 8                     | 43                     | 1                     | 52           | 369.75       |
| <b>P38 MAPK</b>         | 19                    | 14                     | 2                     | 35           | 300          |
| <b>VEGFA</b>            | 12                    | 21                     | 0                     | 33           | 252          |
| <b>Interferon alpha</b> | 11                    | 22                     | 0                     | 33           | 242          |
| <b>PI3K (complex)</b>   | 10                    | 20                     | 1                     | 31           | 215.25       |
| <b>Akt</b>              | 16                    | 9                      | 4                     |              | 198          |
| <b>ERK1/2</b>           | 22                    | 9                      | 0                     | 31           | 198          |
| <b>Jnk</b>              | 16                    | 12                     | 0                     | 28           | 192          |
| <b>IgG</b>              | 7                     | 21                     | 2                     | 30           | 176          |
| <b>CDKN1A</b>           | 25                    | 7                      | 0                     | 32           | 175          |
| <b>MAPK14</b>           | 11                    | 13                     | 2                     | 26           | 168          |
| <b>CEBPB</b>            | 12                    | 8                      | 4                     | 24           | 140          |
| <b>IL1RN</b>            | 11                    | 10                     | 0                     | 21           | 110          |
| <b>NFKBIA</b>           | 14                    | 5                      | 3                     | 22           | 100.75       |
| <b>PRKCB</b>            | 9                     | 10                     | 1                     | 20           | 99.75        |
| <b>Caspase</b>          | 8                     | 12                     | 0                     | 20           | 96           |
| <b>Vegf</b>             | 9                     | 10                     | 0                     | 19           | 90           |
| <b>RUNX1</b>            | 6                     | 10                     | 3                     | 19           | 86.25        |
| <b>IFN Beta</b>         | 6                     | 13                     | 0                     | 19           | 78           |
| <b>SREBF1</b>           | 6                     | 11                     | 1                     | 18           | 74.75        |
| <b>LDL</b>              | 2                     | 36                     | 0                     | 38           | 72           |
| <b>SPI1</b>             | 4                     | 13                     | 2                     | 19           | 70           |
| <b>DUSP1</b>            | 12                    | 5                      | 0                     | 17           | 60           |
| <b>JUNB</b>             | 9                     | 4                      | 3                     | 16           | 57.75        |
| <b>FOXO3</b>            | 7                     | 7                      | 1                     | 15           | 56.25        |
| <b>STAT6</b>            | 7                     | 5                      | 3                     | 15           | 55.25        |
| <b>SATB1</b>            | 2                     | 22                     | 0                     | 24           | 44           |
| <b>MAX</b>              | 5                     | 4                      | 4                     | 13           | 42           |
| <b>CDKN1B</b>           | 19                    | 2                      | 0                     | 21           | 38           |
| <b>PIM1</b>             | 6                     | 6                      | 0                     | 12           | 36           |
| <b>CD14</b>             | 7                     | 4                      | 1                     | 12           | 33.75        |
| <b>CEBPD</b>            | 7                     | 4                      | 1                     | 12           | 33.75        |
| <b>JUND</b>             | 2                     | 16                     | 0                     | 18           | 32           |
| <b>OSM</b>              | 2                     | 16                     | 0                     | 18           | 32           |
| <b>Pkc(s)</b>           | 2                     | 16                     | 0                     | 18           | 32           |
| <b>TLR9</b>             | 4                     | 5                      | 2                     | 11           | 30           |
| <b>LGALS3</b>           | 2                     | 6                      | 3                     | 11           | 26.25        |
| <b>Hsp27</b>            | 4                     | 5                      | 1                     | 10           | 24.75        |
| <b>SNCA</b>             | 2                     | 7                      | 2                     | 11           | 24           |
| <b>CSF1R</b>            | 7                     | 3                      | 0                     | 10           | 21           |

|                  |    |    |   |    |       |
|------------------|----|----|---|----|-------|
| TGM2             | 5  | 1  | 4 | 10 | 21    |
| EPAS1            | 2  | 7  | 1 | 10 | 18.75 |
| PLD1             | 6  | 3  | 0 | 9  | 18    |
| DDIT3            | 10 | 1  | 1 | 12 | 15.75 |
| IL16             | 3  | 5  | 0 | 8  | 15    |
| ELK1             | 9  | 1  | 1 | 11 | 14.25 |
| PF4              | 2  | 7  | 0 | 9  | 14    |
| NTRK1            | 2  | 5  | 1 | 8  | 13.75 |
| ZFP36            | 6  | 2  | 0 | 8  | 12    |
| TCR              | 0  | 10 | 2 | 12 | 11    |
| CFLAR            | 5  | 2  | 0 | 7  | 10    |
| Gm-csf           | 1  | 9  | 0 | 10 | 9     |
| FOSB             | 2  | 1  | 3 | 6  | 8.75  |
| TF               | 3  | 2  | 1 | 6  | 8.75  |
| B2M              | 5  | 1  | 1 | 7  | 8.25  |
| IL2RG            | 1  | 5  | 1 | 7  | 8.25  |
| NCF1C            | 4  | 0  | 3 | 7  | 8.25  |
| F Actin          | 2  | 4  | 0 | 6  | 8     |
| ITGA4            | 3  | 1  | 2 | 6  | 8     |
| Growth hormone   | 1  | 7  | 0 | 8  | 7     |
| ABCA1            | 4  | 1  | 1 | 6  | 6.75  |
| BTK              | 1  | 4  | 1 | 6  | 6.75  |
| GSN              | 2  | 2  | 1 | 5  | 6.25  |
| CISH             | 3  | 2  | 0 | 5  | 6     |
| ID2              | 6  | 1  | 0 | 7  | 6     |
| IL18R1           | 2  | 3  | 0 | 5  | 6     |
| CCND3            | 10 | 0  | 1 | 11 | 5.25  |
| RPLP0 (includes  | 2  | 0  | 3 | 5  | 5.25  |
| CD36             | 4  | 0  | 2 | 6  | 5     |
| CDKN2B           | 5  | 1  | 0 | 6  | 5     |
| FLT3LG           | 1  | 5  | 0 | 6  | 5     |
| IL18RAP          |    | 4  | 2 | 6  | 5     |
| SELP             | 9  | 0  | 1 | 10 | 4.75  |
| DLL4             | 4  | 1  | 0 | 5  | 4     |
| FOXO4            | 2  | 2  | 0 | 4  | 4     |
| KRT10            | 2  | 2  | 0 | 4  | 4     |
| C5AR1            | 0  | 7  | 1 | 8  | 3.75  |
| HK1              | 2  | 1  | 1 | 4  | 3.75  |
| MX1              | 1  | 2  | 1 | 4  | 3.75  |
| NCF2             | 7  | 0  | 1 | 8  | 3.75  |
| CYBB             | 6  | 0  | 1 | 7  | 3.25  |
| IRF9             | 6  | 0  | 1 | 7  | 3.25  |
| FPR1             | 1  | 3  | 0 | 4  | 3     |
| ITGA2B (includes | 2  | 0  | 2 | 4  | 3     |
| TFRC             | 2  | 0  | 2 | 4  | 3     |
| TRIM21           | 1  | 1  | 1 | 3  | 2.25  |
| DUSP10           | 1  | 2  | 0 | 3  | 2     |
| CD46             | 2  | 0  | 1 | 3  | 1.25  |

|                |   |    |   |    |      |
|----------------|---|----|---|----|------|
| GPR56          | 2 | 0  | 1 | 3  | 1.25 |
| LMNA           | 2 | 0  | 1 | 3  | 1.25 |
| MTSS1          | 2 | 0  | 1 | 3  | 1.25 |
| TNS1           | 2 | 0  | 1 | 3  | 1.25 |
| ADA            | 1 | 1  | 0 | 2  | 1    |
| ASAH1          | 1 | 1  | 0 | 2  | 1    |
| PIK3IP1        | 1 | 1  | 0 | 2  | 1    |
| PKN2           | 1 | 1  | 0 | 2  | 1    |
| TMC6           | 1 | 1  | 0 | 2  | 1    |
| C4B            | 1 | 0  | 1 | 2  | 0.75 |
| ITGB7          | 1 | 0  | 1 | 2  | 0.75 |
| SELPLG         | 1 | 0  | 1 | 2  | 0.75 |
| TUBA4A         | 1 | 0  | 1 | 2  | 0.75 |
| PPP1R12B       | 0 | 0  | 1 | 1  | 0.25 |
| STX12          | 0 | 0  | 1 | 1  | 0.25 |
| 26s Proteasome | 0 | 10 | 0 | 10 | 0    |
| ABTB1          | 1 | 0  | 0 | 1  | 0    |
| ADAM15         | 3 | 0  | 0 | 3  | 0    |
| ALDH1A2        | 2 | 0  | 0 | 2  | 0    |
| AVPI1          | 1 | 0  | 0 | 1  | 0    |
| C17ORF59       | 1 | 0  | 0 | 1  | 0    |
| CCR7           | 9 | 0  | 0 | 9  | 0    |
| CD226          | 1 | 0  | 0 | 1  | 0    |
| CD244          | 1 | 0  | 0 | 1  | 0    |
| CD68           | 3 | 0  | 0 | 3  | 0    |
| CD69           | 6 | 0  | 0 | 6  | 0    |
| CHST2          | 1 | 0  | 0 | 1  | 0    |
| CLEC4A         | 1 | 0  | 0 | 1  | 0    |
| CTSB           | 6 | 0  | 0 | 6  | 0    |
| CTSD           | 3 | 0  | 0 | 3  | 0    |
| CXCL11         | 8 | 0  | 0 | 8  | 0    |
| CXCL3          | 8 | 0  | 0 | 8  | 0    |
| DYNLT3         | 2 | 0  | 0 | 2  | 0    |
| ELF1           | 0 | 2  | 0 | 2  | 0    |
| EPSTI1         | 1 | 0  | 0 | 1  | 0    |
| EVI2A          | 1 | 0  | 0 | 1  | 0    |
| FAM110A        | 1 | 0  | 0 | 1  | 0    |
| FAM129A        | 2 | 0  | 0 | 2  | 0    |
| FAM38A         | 1 | 0  | 0 | 1  | 0    |
| G0S2           | 3 | 0  | 0 | 3  | 0    |
| G6PD           | 6 | 0  | 0 | 6  | 0    |
| GHRL           | 0 | 2  | 0 | 2  | 0    |
| GUK1           | 1 | 0  | 0 | 1  | 0    |
| HAVCR1         | 0 | 3  | 0 | 3  | 0    |
| HDGF           | 3 | 0  | 0 | 3  | 0    |
| IRAK4          | 0 | 6  | 0 | 6  | 0    |
| KLRK1          | 2 | 0  | 0 | 2  | 0    |
| KRT13          | 1 | 0  | 0 | 1  | 0    |

|                 |    |   |   |    |   |
|-----------------|----|---|---|----|---|
| <b>LPIN2</b>    | 1  | 0 | 0 | 1  | 0 |
| <b>MCL1</b>     | 18 | 0 | 0 | 18 | 0 |
| <b>NFE2</b>     | 2  | 0 | 0 | 2  | 0 |
| <b>NHLH1</b>    | 1  | 0 | 0 | 1  | 0 |
| <b>PLIN2</b>    | 2  | 0 | 0 | 2  | 0 |
| <b>PPP1R15A</b> | 4  | 0 | 0 | 4  | 0 |
| <b>RAB33A</b>   | 1  | 0 | 0 | 1  | 0 |
| <b>RNASE1</b>   | 0  | 2 | 0 | 2  | 0 |
| <b>RPLP1</b>    | 2  | 0 | 0 | 2  | 0 |
| <b>SLC16A6</b>  | 2  | 0 | 0 | 2  | 0 |
| <b>SLC27A2</b>  | 1  | 0 | 0 | 1  | 0 |
| <b>SYNGR2</b>   | 1  | 0 | 0 | 1  | 0 |
| <b>TAPBP</b>    | 5  | 0 | 0 | 5  | 0 |
| <b>TSPAN17</b>  | 1  | 0 | 0 | 1  | 0 |
| <b>UBE2L6</b>   | 3  | 0 | 0 | 3  | 0 |
| <b>YPEL5</b>    | 1  | 0 | 0 | 1  | 0 |

---
