# Supplementary material
Source: PubMed Central journal article supplement (PMC4151266)
Supplement: NIHMS624103-supplement-mmc7.pdf [file NIHMS624103-supplement-mmc7.pdf]

Table S6 The expressions of central nodes in HESCs-ESERs, ESERs-FLERs and FLERs-PBERs comparisons.

|                                                | Symbol | Description                                                                                                          | HESC    | ESER    | FLER    | PBER    |
|------------------------------------------------|--------|----------------------------------------------------------------------------------------------------------------------|---------|---------|---------|---------|
| <b>Central nodes in HESCs-ESERs comparison</b> |        |                                                                                                                      |         |         |         |         |
| NM_002467                                      | MYC    | Homo sapiens v-myc myelocytomatosis viral oncogene homolog (avian) (MYC), mRNA                                       | 16.1214 | 46.4609 | 32.0935 | 14.3513 |
| NM_000660                                      | TGFB1  | Homo sapiens transforming growth factor, beta 1 (TGFB1), mRNA                                                        | 1.20404 | 6.9097  | 0.29899 | 1.24658 |
| NM_021975                                      | RELA   | Homo sapiens v-rel reticuloendotheliosis viral oncogene homolog A (avian) (RELA), transcript variant 1, mRNA         | 2.68487 | 11.4536 | 2.12555 | 2.69027 |
| NM_002188                                      | IL13   | Homo sapiens interleukin 13 (IL13), mRNA                                                                             | 0       | 0.12519 | 0       | 0       |
| NM_000389                                      | CDKN1A | Homo sapiens cyclin-dependent kinase inhibitor 1A (p21, Cip1) (CDKN1A), transcript variant 1, mRNA                   | 20.6743 | 211.401 | 1.95839 | 2.91612 |
| NM_005194                                      | CEBPB  | Homo sapiens CCAAT/enhancer binding protein (C/EBP), beta (CEBPB), mRNA                                              | 4.61296 | 29.6006 | 6.78817 | 12.7717 |
| NM_173843                                      | IL1RN  | Homo sapiens interleukin 1 receptor antagonist (IL1RN), transcript variant 4, mRNA                                   | 0       | 0.23381 | 1.74364 | 1.81141 |
| NM_002738                                      | PRKCB  | Homo sapiens protein kinase C, beta (PRKCB), transcript variant 2, mRNA                                              | 1.75367 | 12.8339 | 0.78949 | 1.09504 |
| NM_001001890                                   | RUNX1  | Homo sapiens runt-related transcription factor 1 (RUNX1), transcript variant 2, mRNA                                 | 0.28308 | 3.54796 | 1.84288 | 0.8711  |
| NM_004176                                      | SREBF1 | Homo sapiens sterol regulatory element binding transcription factor 1 (SREBF1), transcript variant 2, mRNA           | 3.59926 | 14.8463 | 8.3929  | 15.3626 |
| NM_001080547                                   | SPI1   | Homo sapiens spleen focus forming virus (SFFV) proviral integration oncogene spi1 (SPI1), transcript variant 1, mRNA | 0       | 1.27668 | 0.66423 | 0       |
| NM_004417                                      | DUSP1  | Homo sapiens dual specificity phosphatase 1 (DUSP1), mRNA                                                            | 2.3255  | 15.2198 | 15.7729 | 19.0997 |
| NM_002229                                      | JUNB   | Homo sapiens jun B proto-oncogene (JUNB), mRNA                                                                       | 2.90735 | 115.37  | 34.1188 | 41.6402 |
| NM_201559                                      | FOXO3  | Homo sapiens forkhead box O3 (FOXO3), transcript variant 2, mRNA                                                     | 3.82981 | 41.9165 | 5.5781  | 5.08407 |
| NM_003153                                      | STAT6  | Homo sapiens signal transducer and activator of transcription 6, interleukin-4 induced (STAT6), mRNA                 | 3.00031 | 10.5814 | 1.84211 | 3.5892  |
| NM_139014                                      | MAPK14 | Homo sapiens mitogen-activated protein kinase 14 (MAPK14), transcript variant 4, mRNA                                | 8.8531  | 17.9598 | 12.9651 | 7.9829  |
| NM_001025369                                   | VEGFA  | Homo sapiens vascular endothelial growth factor A (VEGFA), transcript variant 5, mRNA                                | 6.19193 | 57.6704 | 10.4332 | 39.1372 |
| NM_001025366                                   | VEGFA  | Homo sapiens vascular endothelial growth factor A (VEGFA), transcript variant 1, mRNA                                | 6.03256 | 55.5369 | 10.0247 | 37.5783 |
| NM_003376                                      | VEGFA  | Homo sapiens vascular endothelial growth factor A (VEGFA), transcript variant 2, mRNA                                | 6.05933 | 56.1092 | 10.145  | 38.0909 |
| NM_001033756                                   | VEGFA  | Homo sapiens vascular endothelial growth factor A (VEGFA), transcript variant 7, mRNA                                | 6.0721  | 56.8246 | 10.0992 | 39.0855 |
| NM_001025370                                   | VEGFA  | Homo sapiens vascular endothelial growth factor A (VEGFA), transcript variant 6, mRNA                                | 6.24437 | 58.7968 | 10.5704 | 39.9264 |
| NM_001025367                                   | VEGFA  | Homo sapiens vascular endothelial growth factor A (VEGFA), transcript variant 3, mRNA                                | 6.06767 | 56.3551 | 10.1742 | 38.2239 |
| NM_001025368                                   | VEGFA  | Homo sapiens vascular endothelial growth factor A (VEGFA), transcript variant 4, mRNA                                | 6.16046 | 57.2169 | 10.3298 | 38.8085 |
| <b>Central nodes in ESERs-FLERs comparison</b> |        |                                                                                                                      |         |         |         |         |
| NM_000657                                      | BCL2   | Homo sapiens B-cell CLL/lymphoma 2 (BCL2), nuclear gene encoding mitochondrial protein, transcript variant beta, m   | 1.0507  | 0       | 0.58162 | 0       |
| NM_007297                                      | BRCA1  | Homo sapiens breast cancer 1, early onset (BRCA1), transcript variant 3, mRNA                                        | 5.18101 | 2.62737 | 6.72567 | 6.63047 |
| NM_001012270                                   | BIRC5  | Homo sapiens baculoviral IAP repeat-containing 5 (BIRC5), transcript variant 2, mRNA                                 | 20.9257 | 11.215  | 25.4    | 7.37035 |
| NM_182649                                      | PCNA   | Homo sapiens proliferating cell nuclear antigen (PCNA), transcript variant 2, mRNA                                   | 36.3659 | 32.9024 | 105.796 | 30.6522 |
| NM_001008540                                   | CXCR4  | Homo sapiens chemokine (C-X-C motif) receptor 4 (CXCR4), transcript variant 1, mRNA                                  | 1.04481 | 0.3049  | 1.68623 | 0.9921  |
| <b>Central nodes in FLERs-PBERs comparison</b> |        |                                                                                                                      |         |         |         |         |
| NM_000660                                      | TGFB1  | Homo sapiens transforming growth factor, beta 1 (TGFB1), mRNA                                                        | 1.20404 | 6.9097  | 0.29899 | 1.24658 |
| NM_201413                                      | APP    | Homo sapiens amyloid beta (A4) precursor protein (APP), transcript variant 2, mRNA                                   | 121.945 | 9.5129  | 1.85564 | 6.47543 |
| NM_000584                                      | IL8    | Homo sapiens interleukin 8 (IL8), mRNA                                                                               | 0.4312  | 0.67966 | 0       | 1.89556 |
| NM_005252                                      | FOS    | Homo sapiens FBJ murine osteosarcoma viral oncogene homolog (FOS), mRNA                                              | 3.84005 | 5.88667 | 6.73481 | 23.199  |
| NM_001109891                                   | MAPK3  | Homo sapiens mitogen-activated protein kinase 3 (MAPK3), transcript variant 3, mRNA                                  | 8.56749 | 5.65051 | 0.44689 | 2.75487 |
| NM_033668                                      | ITGB1  | Homo sapiens integrin, beta 1 (fibronectin receptor, beta polypeptide, antigen CD29 includes MDF2, MSK12) (ITGB1)    | 55.9085 | 10.6285 | 14.7196 | 34.5583 |
| NM_001001390                                   | CD44   | Homo sapiens CD44 molecule (Indian blood group) (CD44), transcript variant 3, mRNA                                   | 4.82433 | 4.18547 | 2.01682 | 5.65703 |
| NM_138957                                      | MAPK1  | Homo sapiens mitogen-activated protein kinase 1 (MAPK1), transcript variant 2, mRNA                                  | 11.48   | 8.87716 | 2.81134 | 5.90719 |
| NM_001025369                                   | VEGFA  | Homo sapiens vascular endothelial growth factor A (VEGFA), transcript variant 5, mRNA                                | 6.19193 | 57.6704 | 10.4332 | 39.1372 |
| NM_001025366                                   | VEGFA  | Homo sapiens vascular endothelial growth factor A (VEGFA), transcript variant 1, mRNA                                | 6.03256 | 55.5369 | 10.0247 | 37.5783 |
| NM_003376                                      | VEGFA  | Homo sapiens vascular endothelial growth factor A (VEGFA), transcript variant 2, mRNA                                | 6.05933 | 56.1092 | 10.145  | 38.0909 |
| NM_001033756                                   | VEGFA  | Homo sapiens vascular endothelial growth factor A (VEGFA), transcript variant 7, mRNA                                | 6.0721  | 56.8246 | 10.0992 | 39.0855 |
| NM_001025370                                   | VEGFA  | Homo sapiens vascular endothelial growth factor A (VEGFA), transcript variant 6, mRNA                                | 6.24437 | 58.7968 | 10.5704 | 39.9264 |
| NM_001025367                                   | VEGFA  | Homo sapiens vascular endothelial growth factor A (VEGFA), transcript variant 3, mRNA                                | 6.06767 | 56.3551 | 10.1742 | 38.2239 |
| NM_001025368                                   | VEGFA  | Homo sapiens vascular endothelial growth factor A (VEGFA), transcript variant 4, mRNA                                | 6.16046 | 57.2169 | 10.3298 | 38.8085 |
